# Supplementary material for: Identification of key genes and regulators associated with carotenoid metabolism in apricot (Prunus armeniaca) fruit using weighted gene coexpression network analysis
Source: BMC Genomics. 2019 Nov 20;20:876. doi: 10.1186/s12864-019-6261-5 (PMC6865023; doi:10.1186/s12864-019-6261-5)
Supplement: Supplementary file 6 — Additional file 6. Significantly enriched differentially expressed genes (DEGs) in Kyoto Encyclopedia of Genes and Genomes (KEGG) pathways during different ripening stages. [file 12864_2019_6261_MOESM6_ESM.xlsx]

## Sheet: Sheet1
Additional file 6 Significantly enriched differentially expressed genes (DEGs) in Kyoto Encyclopedia of Genes and Genomes (KEGG) pathways during different ripening stages.
Pathway	Enriched pathways	T vs CM		T vs FR		CM vs FR
		All Gene in Pathway	Enriched gene in Pathway	All Gene in Pathway	Enriched gene in Pathway	All Gene in Pathway	Enriched gene in Pathway
Amino acid metabolism	Phenylalanine metabolism; Valine lucine and isoleucine degradation; Glycine.serine and threonine metabolism	48	14	210	7	137	19
Biosynthesis of other secondary metobolites	Phenypropanoid biosynthesis	128	50	210	67	142	59
Carbohydrate metabolism	Starch and sucrose metabolism	156	65	485	110	305	75
Energy metabolism	Oxidative phosphorylation; Photosythesis	19	7	135	43	85	18
Environmental adaptation	Plant-pathogen interaction	192	179	380	342	215	190
Folding,sorting and degradation	Protein processing in endoplasmic reticulum	81	36	174	89	127	59
Global map	Metabolic pathways	417	280	1201	831	842	580
Glycan biosynthesis and metabolism	Glycosylphosphatidylinosital(GPI)-anchor biosyhthesis	26	12	81	33	67	22
Immune system	Natural killer cell mediated cytotoxicty	9	9	26	26	14	14
Lipid metabolism	Glycerophospholipid metabolism	116	39	375	120	252	65
Membrane transport	ABC transporters	17	17	39	39	27	27
Metabolism of cofactors and vitamins	Buiquinone and other terpenoid-quinone biosynthesis; porphyrin and chlorophyll metabolism	22	5	79	19	47	16
Metabolism of other amino acids	Cyanoamino acid metabolism	30	21	68	25	56	31
Metabolism of terpenoids and polyketides	Carotenoid biosynthesis	66	19	125	33	81	16
Nucleotides metabolism	Purine metabolism	96	48	225	117	152	78
Replication and repair	Homologous recombination; Base excision repair	23	7	66	16	57	15
Signal transduction	Plant hormone signal transduction	127	123	293	269	164	149
Transcription	RNA polymerase; Spliceosome	70	42	156	81	127	65
Translation	RNA transport	76	43	196	110	178	84
Transport and catabolism	Endocytosis	54	40	195	127	140	99
